# Supplementary material
Source: PubMed Central journal article supplement (PMC6983300)
Supplement: NIHMS1536904-supplement-3.pdf [file NIHMS1536904-supplement-3.pdf]

Table S1. Oligonucleotide sequence used in this study, related to Figures 1 to 7.

| Name                  | Sequence                     |                              |
|-----------------------|------------------------------|------------------------------|
| Real time-PCR Primers |                              |                              |
|                       | Forward                      | Reverse                      |
| 18S rRNA              | GCTTAATTTGACTCAACACGGGA      | AGCTATCAATCTGTCAATCCTGTC     |
| BMAL1                 | AAGGGAAGCTCACAGTCAGAT        | GGACATTGCGTTGCATGTTGG        |
| CLOCK                 | TGCGAGGAACAATAGACCCAA        | ATGGCCTATGTGTGCGTTGTA        |
| SOX2                  | TCCCGTATGAAAGCATCGTGG        | CCCATTTGGGTAGATCAGGTAAC      |
| OLIG2                 | TGGCTTCAAGTCATCCTCGTC        | ATGGCGATGTTGAGGTCGTG         |
| C-MYC                 | AAAGGCCCCCAAGGTAGTTA         | GCACAAGAGTTCCGTAGCTG         |
| PER1                  | TCCATTCGGGTTACGAAGCT         | GCAGCCCTTTCATCCACATC         |
| PER2                  | TACGCTGGCCACCTTGAAGTA        | CACATCGTGAGGCGCCAGGA         |
| HK2                   | GAGCCACCACTCACCTACT          | CCAGGCATTCGGCAATGTG          |
| LDHA                  | ATGGCAACTCTAAAGGATCAGC       | CCAACCCCAACAACCTGTAATCT      |
| ACO2                  | GATCCACGAGACCAACCTGAAGAA     | CCTTCATTCTGTTGAGGGCACTGC     |
| IDH3a                 | ACATCCTTAGTGACTTGTGTGCAG     | GCATTGCCTCCCAATCTTTTGTC      |
| SUCLA2                | GGGCTGCTGCTCAGGTTCTGGGAAGTTC | GTGCCTTTATCACGACATCTTTTGAACC |
| SDHA                  | CAGCATGTGTTACCAAGCTGT        | GGTGTCTAGAAATGCCACCT         |
| CS                    | GGTGGCATGAGAGGCATGAA         | TAGCCTTGGGTAGCAGTTTCT        |
| ENO1                  | TTGAAGGTCAACCAAATCGGT        | GGAAACCATAACACCCCAACC        |
| ALDOC                 | TGCTGATGACCGTGTGAAAAA        | CGGACGAAGGGAACACCAT          |
| PGM1                  | GCTCAAGCTCTCCAAGATGC         | AACGCTCCCAATTACAGCAC         |
| NPAS2                 | CTCCCTGCCTCCCAACCATC         | GGTCCCTGGCTGTTGTGAGTAG       |
| TP73                  | CTCCCCGCTCTTGAAGAAAC         | GTTGAAGTCCCTCCCGAGC          |
| AGPAT2                | GCCGAGTTCTACGCCAAGG          | CGAACCAGCCGATGATGCT          |
| ACSL3                 | GCCGAGTGGATGATAGCTGC         | ATGGCTGGACCTCCTAGAGTG        |
| ELOVL2                | ATGTTTGGACCGGAGATTCT         | CCCAGCCATATTGAGAGCAGATA      |
| FADS1                 | GTTATCCAGCGAAAGAAGTGGG       | CCAATAGTGGCACATAAGTGAGG      |
| FADS2                 | TGACCGCAAGGTTTACAACAT        | AGGCATCCGTTGCATCTTCTC        |
| ACLY                  | ATCGTTCAAGTATGCTCGGG         | GACCAAGTTTTCCACGACGTT        |
| FASN                  | AAGGACCTGTCTAGGTTTGATGC      | TGGCTTCATAGGTGACTTCCA        |
| CDS2                  | CACTATTGGCTACAACGTCTACC      | AGAAGTAATCCGCTACTGTCTCA      |
| PIGW                  | ATTATTGCCCTCGGCATTAAGT       | GGCATTTAATAGACCAACCCGT       |
| ChIP-qPCR Primers     |                              |                              |

|                                       |                          |                         |
|---------------------------------------|--------------------------|-------------------------|
| ACO2                                  | TTTGGGCAGTCCGATTCCTC     | AAGAGTGGGGCGTCACGGTGAA  |
| SUCLA2                                | ACCCTGTCAATCAGTCAATCAA   | CCTGACAGTCGGCCACTAG     |
| SDHA                                  | GGCGGCAACAGCAGACATGT     | GACTCACCGCCTTGCCAGC     |
| IDH3a                                 | GTAGGTGTGGAACAAACGTC     | GTCTCTGTGACTGGCCTG      |
| CS                                    | CTGTAGCTTCACGCAGGGCT     | AACCAAGGTGAGCAGCGAGG    |
| LDHA                                  | AACCTCCCCAGGTTTCATGGATGA | TGCCCTCCAACCACAGAAGC    |
| HK2                                   | ACGCTCTCTCCCCAGTCCCTTTT  | ATTCTCTCCACGTGCTCTCGCC  |
| SOX2                                  | ACAAAGGTTTCTCAGTGGCTG    | GGAATAAATGGGTTTCTAGCGAC |
| OLIG2                                 | GCCACCGGGCTATAAAAAC      | AAAAGCCTCAGGGGAGAAC     |
| MYC                                   | AATTGTTTTCTCACCGCC       | GAGACGCACTTAGTGAACC     |
| <b>CRISPR-Cas9 targeting sequence</b> |                          |                         |
| sgBMAL1#1                             | GGGTCATCGCCTTCTAGCTG     |                         |
| sgBMAL1#2                             | CTGGACATTGCGTTGCATGT     |                         |
| sgCLOCK#1                             | TAATGTTCTCATTAAAGAAC     |                         |
| sgCLOCK#2                             | GGCAAATACCCTATTATGGG     |                         |
