# Supplementary material
Source: PubMed Central journal article supplement (PMC6983300)
Supplement: NIHMS1536904-supplement-4.pdf [file NIHMS1536904-supplement-4.pdf]

## Supplementary Reagents

| REAGENT or RESOURCE                                                             | SOURCE                    | IDENTIFIER        |
|---------------------------------------------------------------------------------|---------------------------|-------------------|
| <b>Antibodies</b>                                                               |                           |                   |
| Rabbit monoclonal anti-BMAL1                                                    | Cell Signaling Technology | Cat # 14020       |
| Rabbit polyclonal anti-CLOCK                                                    | Cell Signaling Technology | Cat # 5157        |
| Mouse polyclonal anti-MYC                                                       | Sant Cruz                 | Cat # sc-764      |
| Rabbit polyclonal anti-SOX2                                                     | Millipore                 | Cat # AB5603      |
| Mouse polyclonal anti-OLIG2                                                     | Millipore                 | Cat # MABN50      |
| Mouse monoclonal anti-TUBULIN                                                   | Sigma                     | Cat # T6074       |
| Mouse monoclonal anti-Ki67                                                      | Dako                      | Cat # M7240       |
| Rabbit polyclonal anti-cleaved CASPASE 3                                        | Cell signaling Technology | Cat # 9664        |
| Rabbit monoclonal anti-PARP                                                     | Cell signaling Technology | Cat # 9532        |
| Rabbit Cleaved PARP                                                             | Cell signaling Technology | Cat # 5625        |
| NPAS2 antibody                                                                  | Abcam                     | ab137601          |
| TP73 antibody                                                                   | Proteintech               | 66990-1-Ig        |
| Alexa Fluor 568 Donkey anti-Goat                                                | Life Technologies         | Cat # A-11057     |
| Alexa Fluor 488 Donkey anti-Mouse                                               | Life Technologies         | Cat # A-21202     |
| <b>Chemicals, Peptides, and Recombinant Proteins</b>                            |                           |                   |
| D-Luciferin                                                                     | Sigma-Aldrich             | Cat # L9504       |
| SR9009                                                                          | Calbiochem                | Cat # 554729      |
| SR9011                                                                          | Xcess Biosciences         | Cat # M66049-2    |
| KL001                                                                           | Sigma-Aldrich             | Cat # SML1032     |
| z-VAD-FMK                                                                       | R&D system                | Cat # FMK001      |
| Dexamethasone                                                                   | Sigma-Aldrich             | Cat # D1756       |
| Protease Inhibitor Cocktail                                                     | Roche                     | Cat # 4693159001  |
| Matrigel hESC-Qualified Matrix                                                  | Corning                   | Cat # 354277      |
| CellTiter-Glo Luminescent Cell Viability Assay                                  | Promega                   | Cat # G7571       |
| Seahorse XF Base Medium                                                         | Agilent Technology        | Cat #102353-100   |
| Neurobasal-A Medium                                                             | Life Technologies         | Cat # A2477501    |
| DAPI                                                                            | Life Technologies         | Cat # D1306       |
| GlutaMAX Supplement                                                             | Life Technologies         | Cat # 35050061    |
| B27-supplement w/o Vitamin A                                                    | Life Technologies         | Cat # 12587010    |
| Sodium Pyruvate                                                                 | Life Technologies         | Cat # 11360070    |
| FGF recombinant                                                                 | R&D Systems               | Cat # 4114-TC-01M |
| EGF recombinant                                                                 | R&D Systems               | Cat # 236-EG-01M  |
| ANTI-FLAG M2 affinity gel                                                       | Sigma-Aldrich             | Cat # A2220       |
| PVDF membranes EMD                                                              | Millipore                 | Cat # ISEQ00010   |
| <b>Critical Commercial Assays</b>                                               |                           |                   |
| Seahorse XF Cell Mito Stress Test Kit                                           | Agilent Technology        | Cat # 103015-100  |
| Dead Cell Apoptosis Kit with Annexin V Alexa Fluor® 488 & Propidium Iodide (PI) | Life Technology           | Cat # V13241      |

|                                                                      |                              |                  |
|----------------------------------------------------------------------|------------------------------|------------------|
| Click-iT® Plus EdU Alexa Fluor® 488 Flow Cytometry Assay Kit         | Life Technology              | Cat # C10632     |
| Magna CHIP™ A/G Chromatin Immunoprecipitation Kit                    | Millipore                    | Cat # 17-10085   |
| ThruPLEX® NGS Library Preparation Kit                                | Rubicon                      | Cat # R400427    |
| High Capacity cDNA Reverse Transcription Kit                         | Life Technology              | Cat # 4368814    |
| SYBR Green PCR Master Mix                                            | Applied biosystems           | Cat # 4309155    |
| In-Fusion® HD Cloning Plus                                           | Clontech                     | Cat # 638920     |
| Q5® Site-Directed Mutagenesis Kit                                    | New England Biolabs          | Cat # E0054S     |
| Thermo Scientific™ SuperSignal™ West Pico Chemiluminescent Substrate | Thermo Fisher                | Cat # PI34080    |
| Deposited Data                                                       |                              |                  |
| Experimental Models: Cell Lines                                      |                              |                  |
| NHA                                                                  | Lonza                        | Cat # CC-2565    |
| Experimental Models: Organisms/Strains                               |                              |                  |
| NSG (NOD.Cg-Prkdcscid Il2rgtm1Wjl/SzJ)                               | The Jackson Laboratory       | JAX: 005557      |
| Oligonucleotides                                                     |                              |                  |
| qPCR Primer sets see Table S1                                        |                              |                  |
| Recombinant DNA                                                      |                              |                  |
| Lentiviral Blank Control Vectors                                     | Applied Biological Materials | Plasmid # LV590  |
| pCMV-dR8.2                                                           | Addgene                      | Plasmid # 8455   |
| pCI-VSVG                                                             | Addgene                      | Plasmid # 1733   |
| pLKO.1 non-targeting vector                                          | Sigma-Aldrich                | Plasmid # SHC002 |
| BMAL1 shRNA 1536                                                     | Sigma-Aldrich                | TRCN0000019097   |
| BMAL1 shRNA 698                                                      | Sigma-Aldrich                | TRCN0000019096   |
| CLOCK shRNA 1053                                                     | Sigma-Aldrich                | TRCN0000018976   |
| CLOCK shRNA 1494                                                     | Sigma-Aldrich                | TRCN0000018978   |
| SDHA shRNA 1523                                                      | Sigma-Aldrich                | TRCN0000028043   |
| SDHA shRNA 619                                                       | Sigma-Aldrich                | TRCN0000028085   |
| NPAS2 shRNA 1137                                                     | Sigma-Aldrich                | TRCN0000234495   |
| NPAS2 shRNA 469                                                      | Sigma-Aldrich                | TRCN0000234492   |
| pLV6-Bmal-Luc                                                        | Addgene                      | Plasmid # 68833  |
| pCDH-MCS-T2A-Puro-MSCV                                               | System Biosciences           | CD522A-1         |
| pCDH-MSCV-MCS-EF1a-GFP                                               | System Biosciences           | CD711-B1         |
| pLV[Exp]-EGFP:T2A:Puro-EF1A>hARNTL                                   | Vectorbuilder                | VB161019-1118qsc |
| pLV[Exp]-Puro-CMV>3xFLAG/hCLOCK                                      | Vectorbuilder                | VB170403-1071kfe |
| pDONR223_CRY1_WT                                                     | Addgene                      | Plasmid # 82264  |
